# Supplementary material for: Technical note: Boundary layer height determination from Lidar for improving air pollution episode modelling: development of new algorithm and evaluation
Source: Copernicus journal article supplement (doi:10.5194/acp-2016-1010), 2017-01-03
Supplement: Supplementary file 1 [file acp-2016-1010-supplement.pdf]

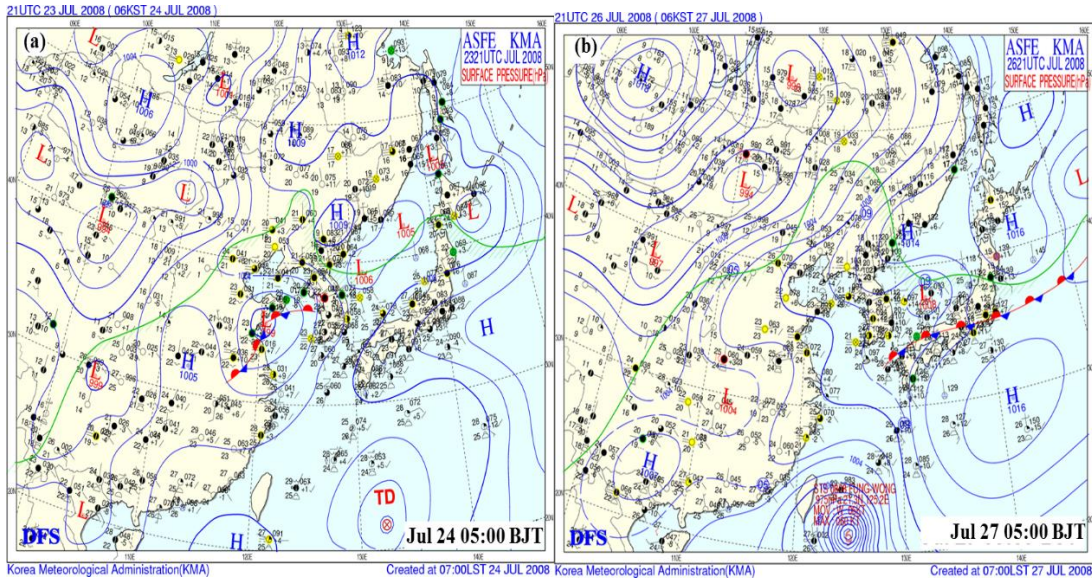

**Figure S1.** Surface weather maps for 05:00 am Beijing Local Time (BJT) (Source: Korea Meteorological Administration). (a) Jul.24, 2008. (b) Jul. 27, 2008.

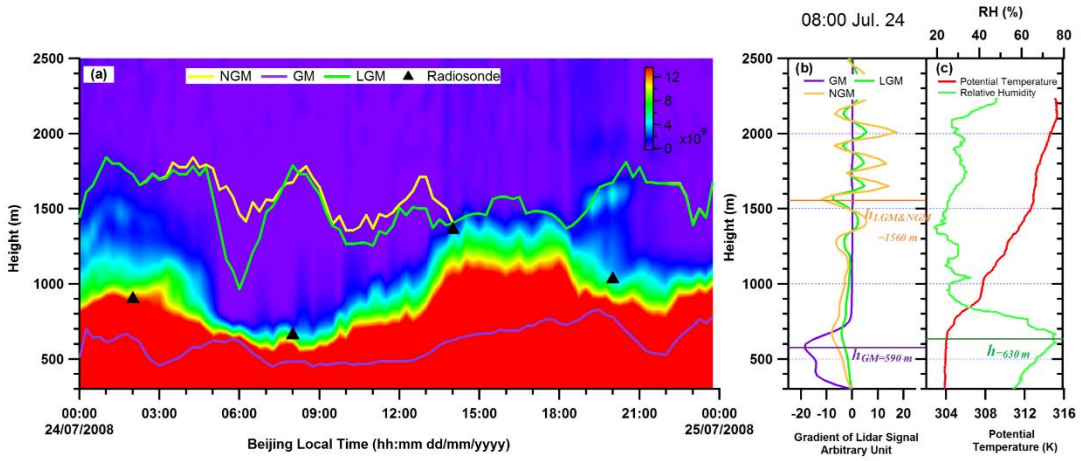

**Figure S2.** (a) Same as Fig. 2a but for Jul. 24; (b) Same as Fig. 2b but for 08:00 on Jul. 24; (c) Same as Fig. 2c but for 08:00 on Jul. 24.

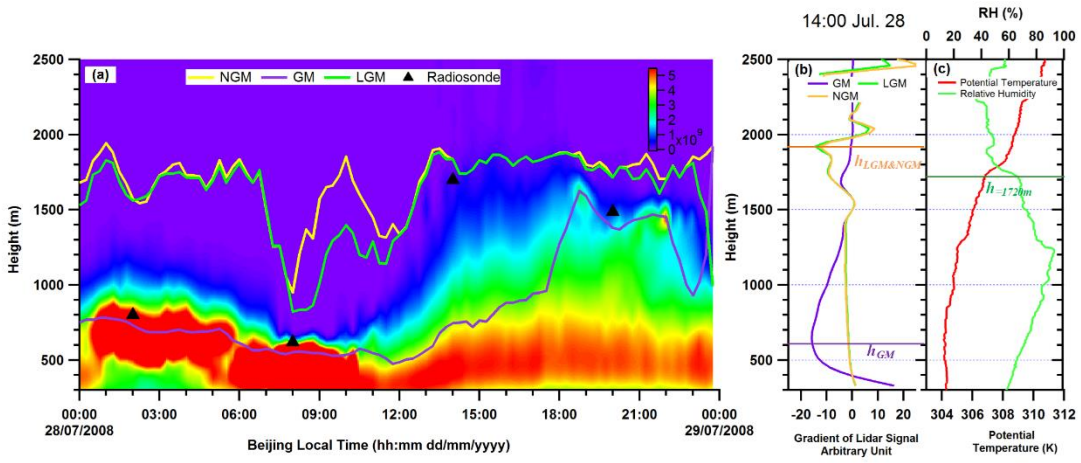

**Figure S3.** (a) Same as Fig. 2a but for Jul. 28; (b) Same as Fig. 2b but for 14:00 on Jul. 28; (c) Same as Fig. 2c but for 14:00 on Jul. 28.

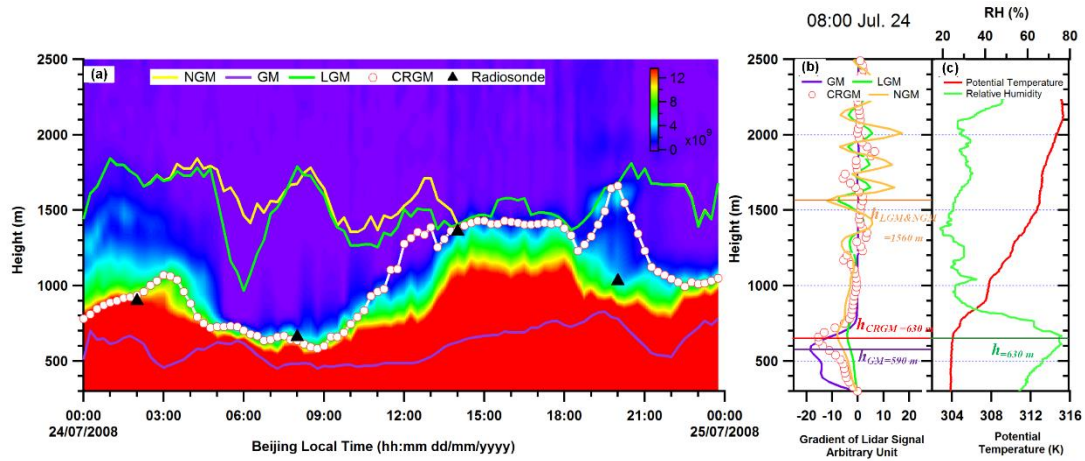

**Figure S4.** (a) Same as Fig. 4a but for Jul. 24; (b) Same as Fig. 4b but for 08:00 on Jul. 24; (c) Same as Fig. 4c but for 08:00 on Jul. 24.

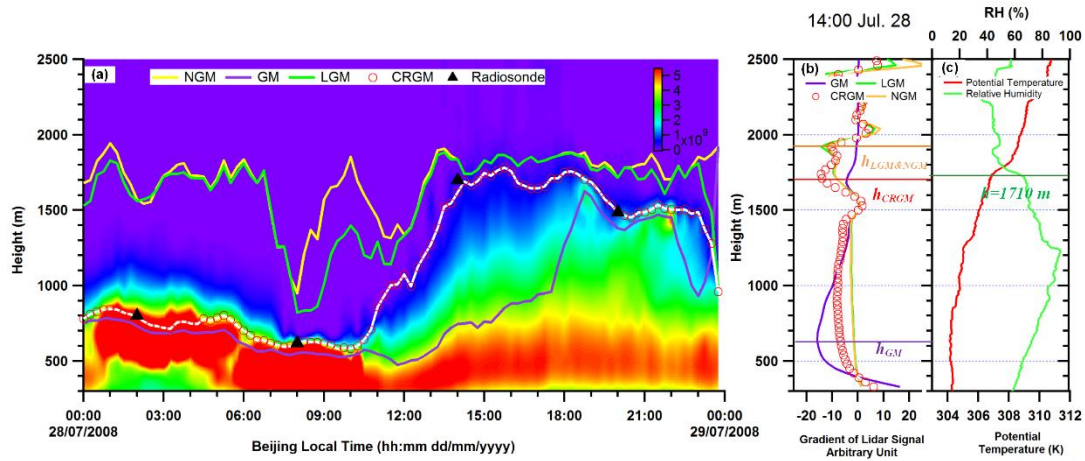

**Figure S5.** (a) Same as Fig. 4a but for Jul. 28; (b) Same as Fig. 4b but for 14:00 on Jul. 28; (c) Same as Fig. 4c but for 14:00 on Jul. 28.
